# Supplementary material for: Knockdown of CMTM3 promotes metastasis of gastric cancer via the STAT3/Twist1/EMT signaling pathway
Source: PubMed Central journal article supplement (PMC5045413; doi:10.18632/oncotarget.8789), 2016-04-18
Supplement: oncotarget-07-29507-s001.pdf [file oncotarget-07-29507-s001.pdf]

## SUPPLEMENTARY FIGURES

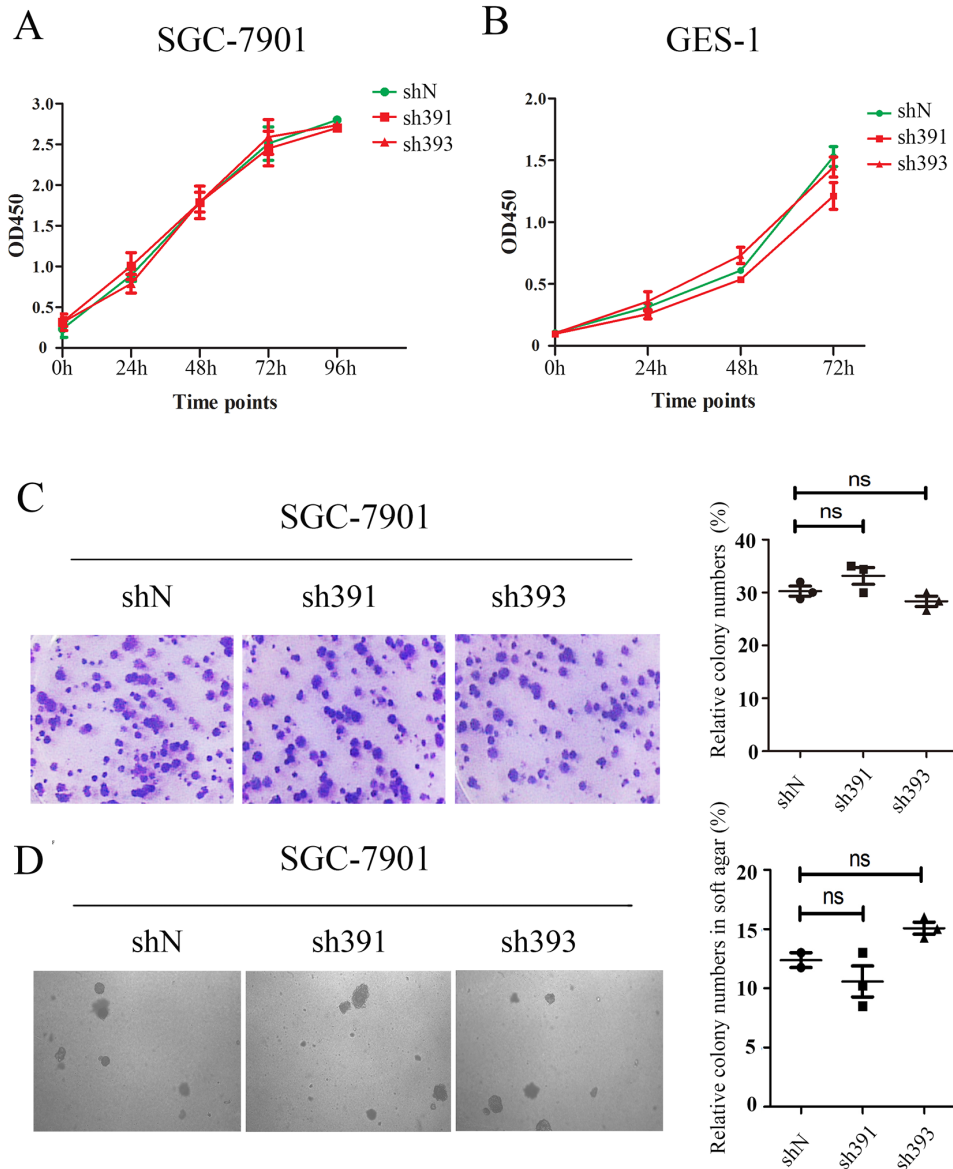

**Supplementary Figure S1: Stable knockdown of CMTM3 does not affect cell proliferation.** **A, B.** CCK8 assay of shN, sh391 and sh393 of SGC-7901 and GES-1 cells. **C.** plate colony formation assay of shN and CMTM3-knockdown-SGC-7901 cells; the colonies ( $\geq 50$ ) were quantified and representative images of cell colonies were obtained. **D.** soft-agar colony formation assay of shN and CMTM3-knockdown-SGC-7901 cells; the colonies ( $\geq 50$ ) were quantified and representative images were obtained (100  $\times$  magnification). Data are presented as the mean $\pm$ s.d (ns, not significant).

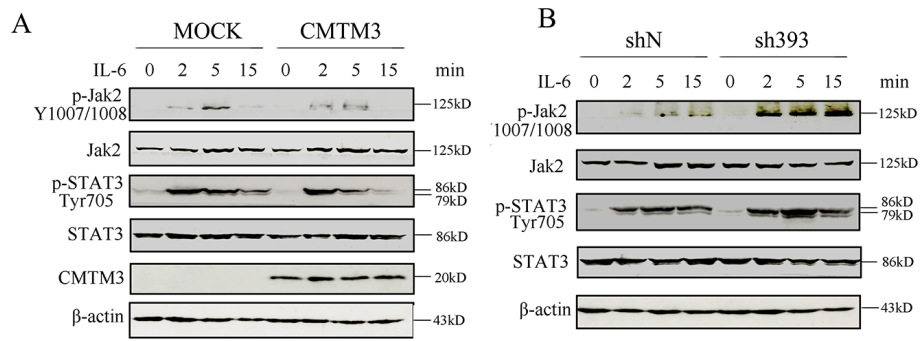

**Supplementary Figure S2: CMTM3 has suppressive effects on IL-6 induced Jak2-STAT3 phosphorylation.** A. p-Jak2 and p-STAT3 were detected with stimulation of IL-6 (50ng/mL) for different time points in CMTM3 restored SGC-7901 cells. B. p-Jak2 and p-STAT3 were detected with stimulation of IL-6 (50ng/mL) for different time points in CMTM3 knockdown SGC-7901 cells.
